# Supplementary material for: Expression of Cholinergic Markers and Characterization of Splice Variants during Ontogenesis of Rat Dorsal Root Ganglia Neurons
Source: MDPI journal article supplement (doi:10.3390/ijms22115499), 2021-05-23
Supplement: s1 [file s1]

**TableS1.** Forward and reverse primer sequences, lenght of amplified product (bp) and the annealing temperature (Ta °C) used in RT-PCR experiments for the following genes: hypoxantine-phosphoribosyl-transferase (HPRT); the isoforms of choline acetyltransferase (R1, R2, M and N1/N2 ChAT ); the isoforms of vesicular acetylcholine transporter ( R1, V1 and V3 VAcHT).

| <i>Gene</i>       | <i>Forward 5'-3'</i>      | <i>Reverse 5'-3'</i>     | <i>Lenght (bp)</i> | <i>Ta °C</i> |
|-------------------|---------------------------|--------------------------|--------------------|--------------|
| <i>HPRT</i>       | CCTGCTGGATTACATTAAAGCACTG | CTTCGTGGGGTCCTTTTCACCAGC | 282 bp             | 60°C         |
| <i>R1 ChAT</i>    | AGCCTTCCTAAGCCTCTACTG     | CTAAGCACACCAGAGATGAGG    | 521 bp             | 58°C         |
| <i>R2 ChAT</i>    | GAAGGAAGGTCTACAGCTCTG     | CTAAGCACACCAGAGATGAGG    | 453 bp             | 58°C         |
| <i>M ChAT</i>     | GAAGGCAGAAGATGGGAATCG     | CTAAGCACACCAGAGATGAGG    | 802 bp             | 60°C         |
| <i>N1/N2 ChAT</i> | GAGGTAGTCCCGTCTTTTAGG     | CTAAGCACACCAGAGATGAGG    | 767-575 bp         | 56°C         |
| <i>R1 VAcHT</i>   | AGCCTTCCTAAGCCTCTACTG     | CTTCCCTAAGATGCCTCCAC     | 413 bp             | 58°C         |
| <i>V1 VAcHT</i>   | GTGGAGGAAGAGGCAAG         | GCAGAGGCTAGGATAAGG       | 352 bp             | 56°C         |
| <i>V3 VAcHT</i>   | GAGGAGTTAGATTGAGGAGTG     | ATGAGGGTATGAGGACTGAG     | 189 bp             | 56°C         |
